# Supplementary material for: Structural diversity and magnetic properties of six cobalt coordination polymers based on 2,2′-phosphinico-dibenzoate ligand
Source: Royal Society of Chemistry journal article supplement (doi:10.1039/c6dt04010a), 2016-01-01
Supplement: c6dt04010a1.pdf [file c6dt04010a1.pdf]

## Electronic supplementary information

Structural diversity and magnetic properties of six cobalt coordination polymers based on  
2,2'-phosphinico-dibenzoate ligand

Zhao-Xi Wang,<sup>\*,a,b</sup> Lin-Fei Wu,<sup>a</sup> Xuan Zhang,<sup>c</sup> Feifei Xing,<sup>a</sup> Ming-Xing Li<sup>\*a</sup>

<sup>a</sup> Department of Chemistry, Center for Supramolecular and Catalytic Chemistry, Shanghai University, Shanghai 200444, People's Republic of China

<sup>b</sup> State Key Laboratory of Coordination Chemistry, Nanjing University, Nanjing 210093, People's Republic of China

<sup>c</sup> Department of Chemistry, Texas A&M University, P.O. Box 30012, College Station, TX 77842-3012, USA

**Table S1.** Selected Bond Distances (Å) and Angles (deg) for **1–6**.

| <b>1</b>          |            |                    |            |                    |            |
|-------------------|------------|--------------------|------------|--------------------|------------|
| Co(1)-O(5A)       | 2.037(3)   | Co(1)-O(42)        | 2.053(3)   | Co(1)-O(38)        | 2.235(3)   |
| Co(1)-O(41)       | 2.069(3)   | Co(1)-O(17)        | 2.096(3)   | Co(1)-O(40)        | 2.119(3)   |
| Co(2)-O(9)        | 2.020(3)   | Co(2)-O(6A)        | 2.027(3)   | Co(2)-O(8)         | 2.157(3)   |
| Co(2)-O(17)       | 2.096(3)   | Co(2)-O(16)        | 2.110(3)   | Co(2)-O(38)        | 2.188(3)   |
| Co(3)-O(3)        | 1.969(3)   | Co(3)-O(12)        | 2.018(3)   | Co(3)-O(1)         | 2.082(3)   |
| Co(3)-O(31)       | 2.034(3)   | Co(3)-O(10)        | 2.048(3)   |                    |            |
| Co(4)-O(37)       | 2.063(3)   | Co(4)-O(2)         | 2.095(3)   | Co(4)-O(15)        | 1.991(3)   |
| Co(4)-O(30)       | 2.122(3)   | Co(4)-O(43)        | 2.163(3)   | Co(4)-O(14)        | 2.251(3)   |
| Co(5)-O(39)       | 2.075(3)   | Co(5)-O(10)        | 2.116(3)   | Co(5)-O(37)        | 2.060(3)   |
| Co(5)-O(16)       | 2.123(3)   | Co(5)-O(8)         | 2.143(3)   | Co(5)-O(32)        | 2.196(3)   |
| Co(6)-O(39)       | 1.978(3)   | Co(6)-O(7)         | 2.002(3)   | Co(6)-O(33)        | 1.931(3)   |
| Co(6)-O(19)       | 2.027(3)   | Co(6)-O(32)        | 2.335(3)   |                    |            |
| Co(7)-O(39)       | 2.020(3)   | Co(7)-O(37)        | 2.046(3)   | Co(7)-O(14)        | 2.317(3)   |
| Co(7)-O(29)       | 2.047(3)   | Co(7)-O(27)        | 2.116(3)   | Co(7)-O(34)        | 2.184(3)   |
| Co(8)-O(22)       | 1.998(3)   | Co(8)-O(26)        | 2.008(3)   | Co(8)-O(20)        | 2.062(3)   |
| Co(8)-O(13)       | 2.047(3)   | Co(8)-O(27)        | 2.052(3)   |                    |            |
| Co(9)-O(24B)      | 2.038(3)   | Co(9)-O(36)        | 2.062(3)   | Co(9)-O(28)        | 2.023(3)   |
| Co(9)-O(29)       | 2.083(3)   | Co(9)-O(34)        | 2.136(3)   | Co(9)-O(44)        | 2.195(3)   |
| Co(10)-O(45)      | 2.077(3)   | Co(10)-O(46)       | 2.088(3)   | Co(10)-O(23B)      | 2.052(3)   |
| Co(10)-O(47)      | 2.094(3)   | Co(10)-O(36)       | 2.128(3)   | Co(10)-O(44)       | 2.181(3)   |
| Co(1)-O(17)-Co(2) | 99.60(11)  | Co(2)-O(38)-Co(1)  | 92.77(10)  | Co(2)-O(16)-Co(5)  | 100.84(11) |
| Co(3)-O(10)-Co(5) | 113.62(12) | Co(4)-O(14)-Co(7)  | 89.65(10)  | Co(5)-O(37)-Co(4)  | 123.90(13) |
| Co(5)-O(8)-Co(2)  | 98.67(11)  | Co(5)-O(32)-Co(6)  | 87.18(10)  | Co(6)-O(39)-Co(5)  | 100.89(11) |
| Co(6)-O(39)-Co(7) | 120.89(13) | Co(7)-O(37)-Co(5)  | 96.12(11)  | Co(7)-O(37)-Co(4)  | 103.21(11) |
| Co(7)-O(29)-Co(9) | 104.39(11) | Co(7)-O(39)-Co(5)  | 96.49(11)  | Co(8)-O(27)-Co(7)  | 115.18(12) |
| Co(9)-O(34)-Co(7) | 98.11(10)  | Co(9)-O(36)-Co(10) | 98.66(11)  | Co(10)-O(44)-Co(9) | 93.18(10)  |
| <b>2</b>          |            |                    |            |                    |            |
| Co(1)-O(3A)       | 2.006(2)   | Co(1)-O(3)         | 2.006(2)   | Co(1)-O(2)         | 2.119(3)   |
| Co(1)-O(2A)       | 2.119(3)   | Co(1)-N(6B)        | 2.169(3)   | Co(1)-N(6C)        | 2.169(3)   |
| Co(2)-O(4)        | 1.964(3)   | Co(2)-O(1D)        | 2.021(3)   | Co(2)-O(5E)        | 2.109(3)   |
| Co(2)-N(1)        | 2.129(3)   | Co(2)-O(6E)        | 2.258(3)   |                    |            |
| <b>3</b>          |            |                    |            |                    |            |
| Co(1)-N(1)        | 2.187(2)   | Co(1)-O(2)         | 2.135(2)   | Co(1)-O(2A)        | 2.2908(19) |
| Co(1)-O(3)        | 2.0187(19) | Co(1)-O(7)         | 2.051(2)   | Co(1)-O(8)         | 2.117(3)   |
| Co(2)-O(4)        | 2.054(2)   | Co(2)-O(4B)        | 2.054(2)   | Co(2)-O(5)         | 2.0589(19) |
| Co(2)-O(5B)       | 2.059(2)   | Co(2)-O(9B)        | 2.153(2)   | Co(2)-O(9)         | 2.153(2)   |
| Co(1)-O(2)-Co(1A) | 103.68(8)  |                    |            |                    |            |
| <b>4</b>          |            |                    |            |                    |            |
| Co(1)-N(1)        | 2.2281(18) | Co(1)-O(2)         | 2.1222(16) | Co(1)-O(2C)        | 2.2625(15) |
| Co(1)-O(3)        | 2.0079(15) | Co(1)-O(7)         | 2.0621(15) | Co(1)-O(8)         | 2.1337(16) |
| Co(2)-N(2)        | 2.160(2)   | Co(2)-N(2B)        | 2.160(2)   | Co(2)-O(4)         | 2.0767(15) |
| Co(2)-O(4B)       | 2.0767(15) | Co(2)-O(5)         | 2.0404(15) | Co(2)-O(5B)        | 2.0404(15) |
| Co(1)-O(2)-Co(1C) | 104.90(6)  |                    |            |                    |            |
| <b>5</b>          |            |                    |            |                    |            |
| Co(1)-N(2)        | 2.167(3)   | Co(1)-N(3B)        | 2.137(3)   | Co(1)-O(4)         | 1.9956(15) |
| Co(1)-O(4A)       | 1.9956(15) | Co(1)-O(5)         | 2.1580(15) | Co(1)-O(5A)        | 2.1580(15) |
| Co(2)-N(1)        | 2.1014(19) | Co(2)-O(1C)        | 2.2242(16) | Co(2)-O(2C)        | 2.0938(16) |
| Co(2)-O(3)        | 1.9783(15) | Co(2)-O(6D)        | 2.0282(16) |                    |            |
| <b>6</b>          |            |                    |            |                    |            |
| Co(1)-O(6)        | 2.0755(17) | Co(1)-O(6A)        | 2.0755(17) | Co(1)-O(9)         | 2.1043(19) |
| Co(1)-O(9A)       | 2.1043(19) | Co(1)-O(10A)       | 2.0625(17) | Co(2)-N(1)         | 2.023(2)   |
| Co(2)-O(2B)       | 1.9656(18) | Co(2)-O(4)         | 1.9220(18) | Co(2)-O(10)        | 2.0173(18) |
| Co(3)-O(3B)       | 1.9584(17) | Co(3)-O(5A)        | 2.0504(18) | Co(3)-O(8C)        | 1.9481(19) |
| Co(3)-O(10)       | 2.0027(17) |                    |            |                    |            |
| Co(3)-O(10)-Co(2) | 104.79(8)  | Co(3)-O(10)-Co(1)  | 117.00(8)  | Co(2)-O(10)-Co(1)  | 106.62(8)  |

Symmetry codes: A:  $x-1, y, z$ ; B:  $x+1, y, z$  (**1**); A:  $-x+1, -y, -z+1$ ; B:  $x+1/2, -y+1/2, z-1/2$ ; C:  $-x+1/2, y-1/2, -z+3/2$ ; D:  $-x+1, -y+1, -z+1$ ; E:  $x, y+1, z$  (**2**); A:  $-x+1, -y, -z$ ; B:  $-x+1, -y+1, -z$ ; C:  $-x, -y, -z+1$  (**3**); A:  $-x+1, -y, -z+2$ ; B:  $-x, -y+1, -z+1$ ; C:  $-x, -y, -z+1$  (**4**); A:  $-x, y, -z+1/2$ ; B:  $x, y-1, z$ ; C:  $x, -y, z+1/2$ ; D:  $-x, -y, -z+1$  (**5**); A:  $-x+1, -y+1, -z+1$ ; B:  $x+1, y, z$ ; C:  $x, -y+1/2, z-1/2$  (**6**).

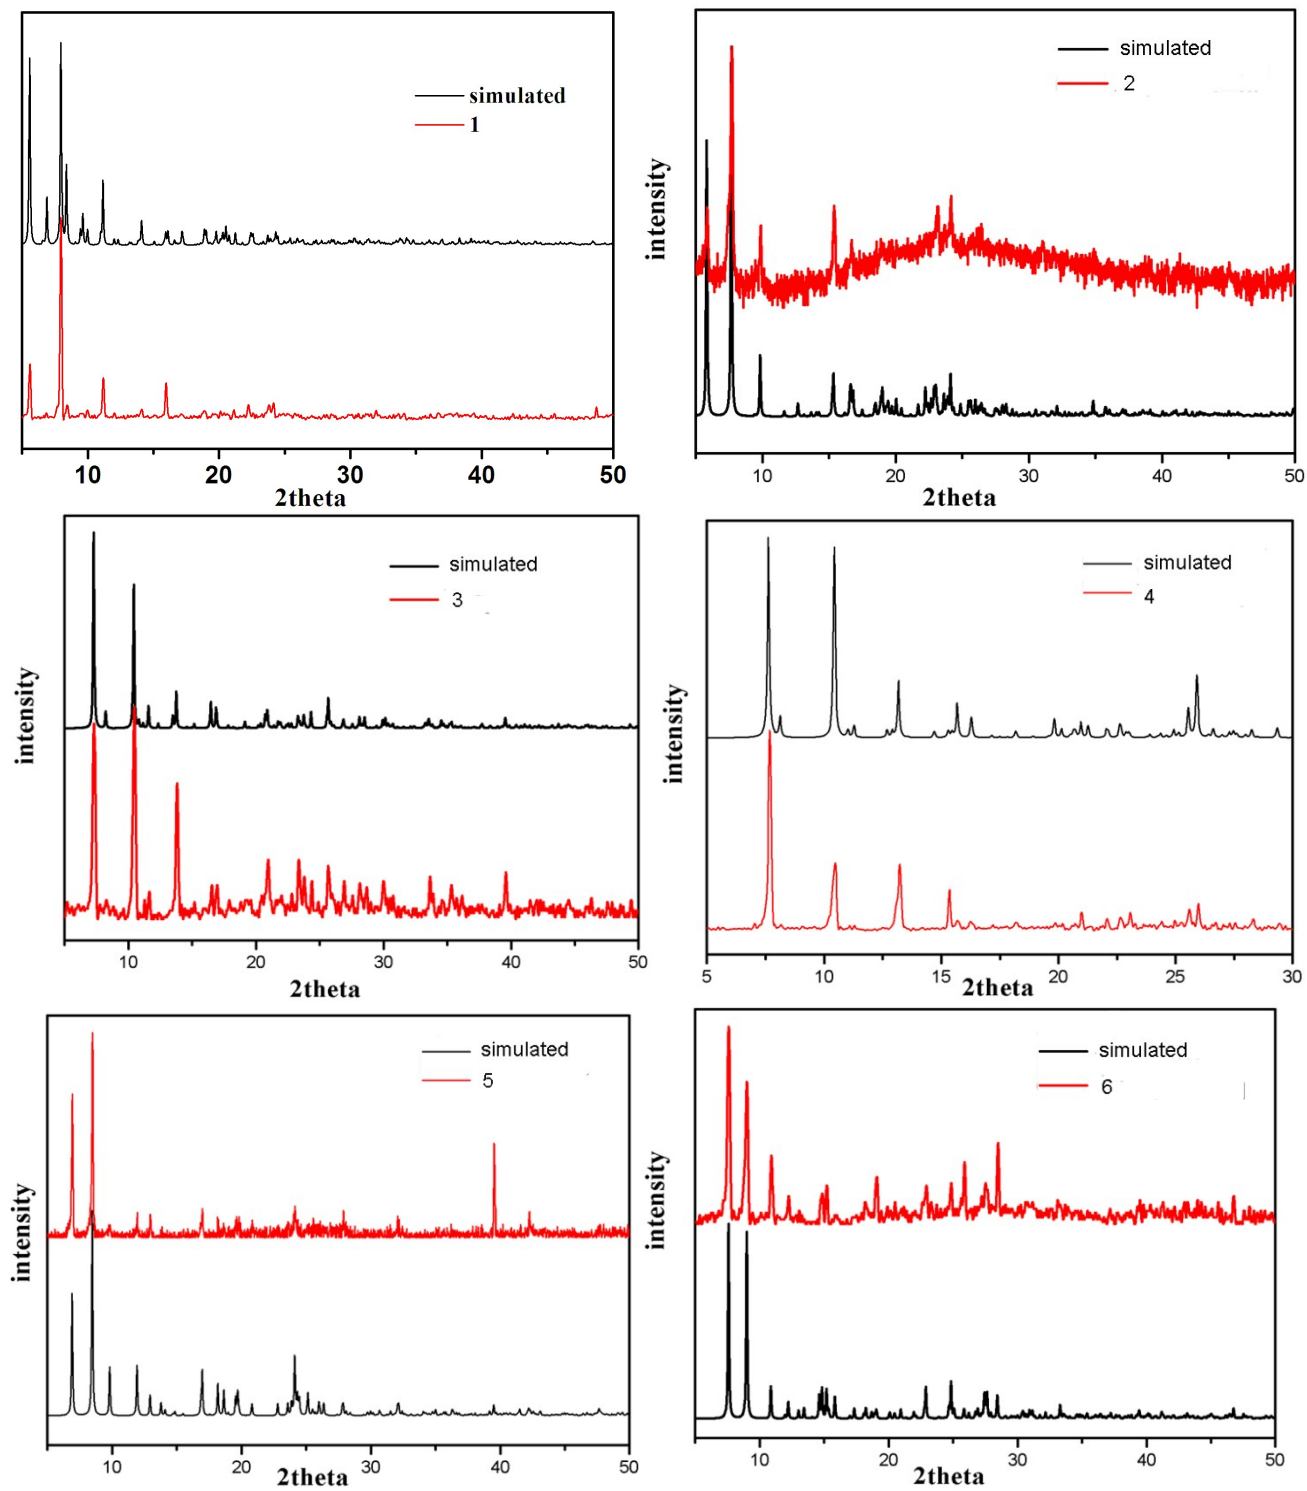

Fig. S1. PXRD patterns of 1-6.

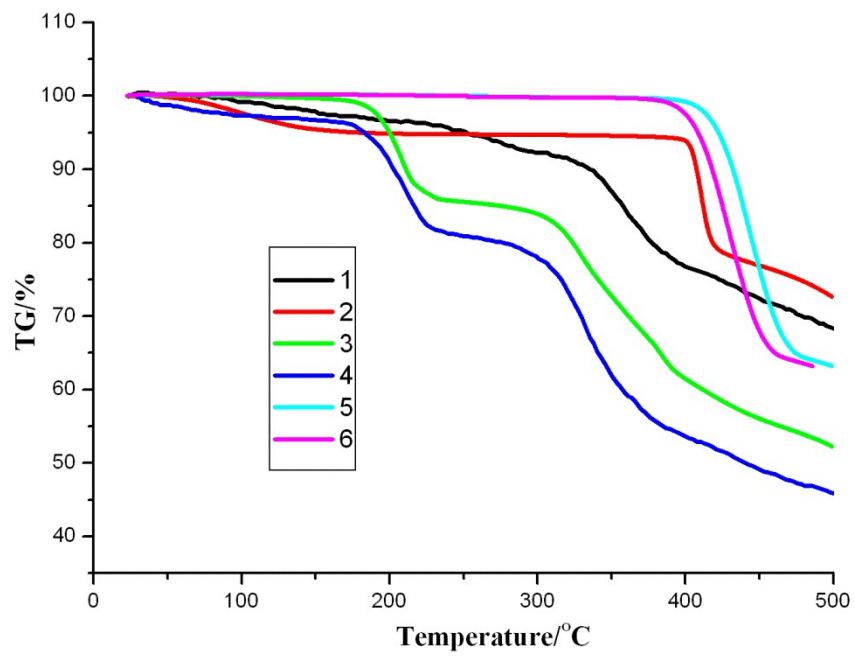

Fig. S2. Thermogravimetric curves of compounds 1-6.

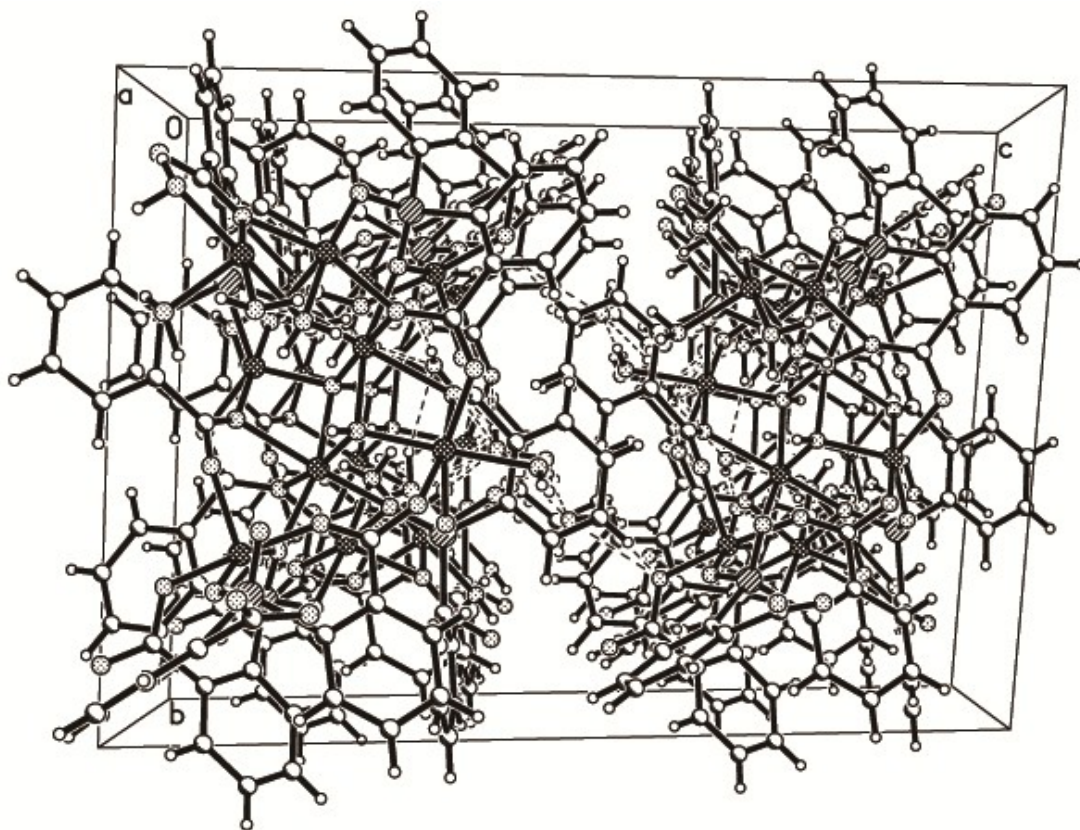

Fig. S3. 3D supramolecular structure of 1.

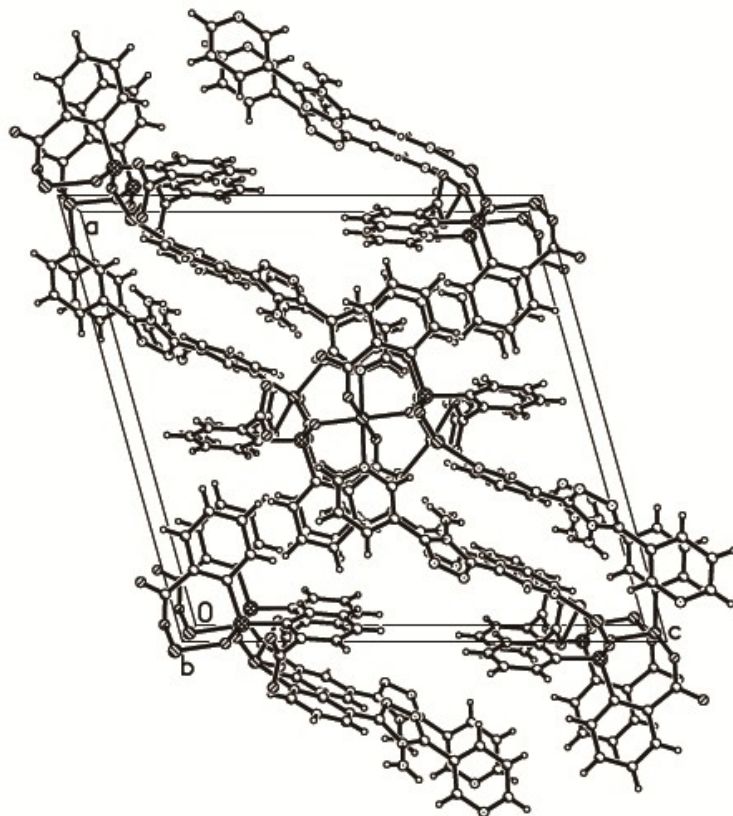

**Fig. S4.** 3D supramolecular structure of **2**.

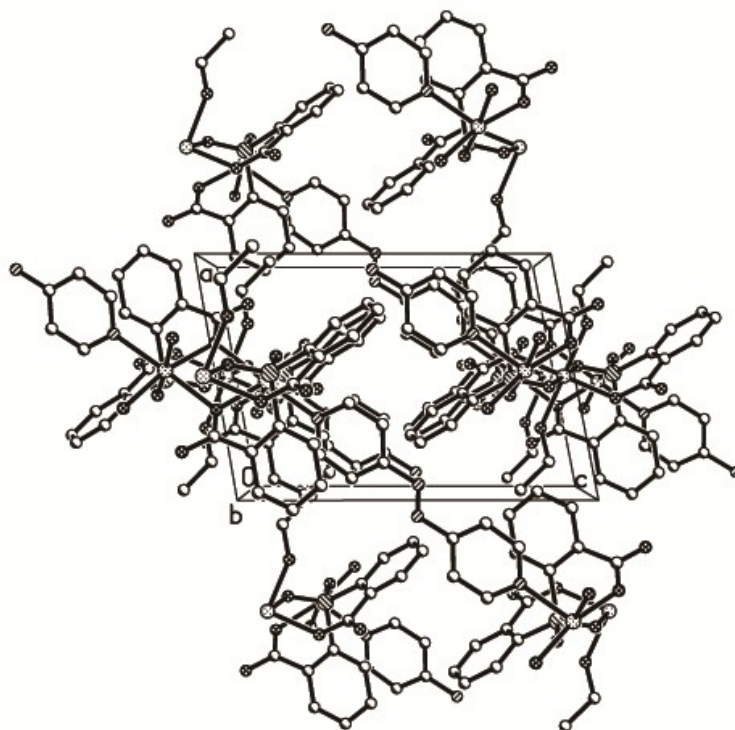

**Fig. S5.** 3D supramolecular structure of **3**.

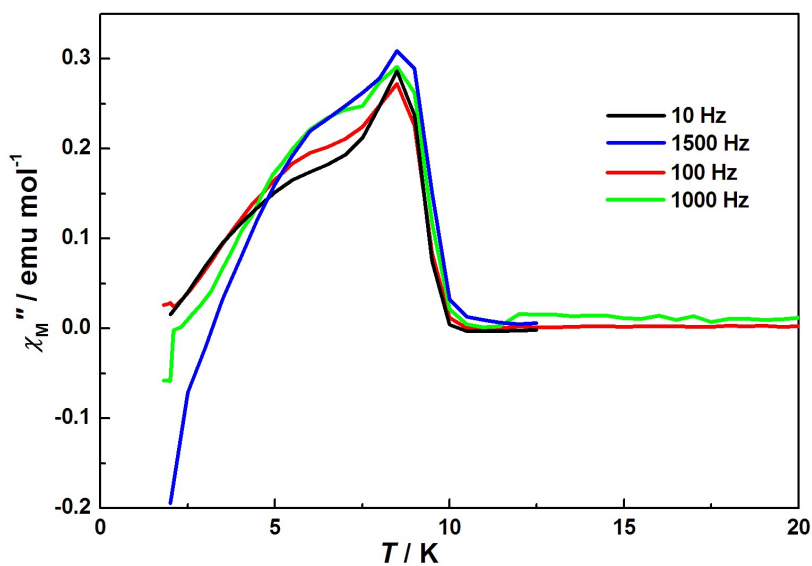

**Fig. S6.** Temperature dependence of the imaginary parts of **1** measured under various oscillating frequencies with zero field.

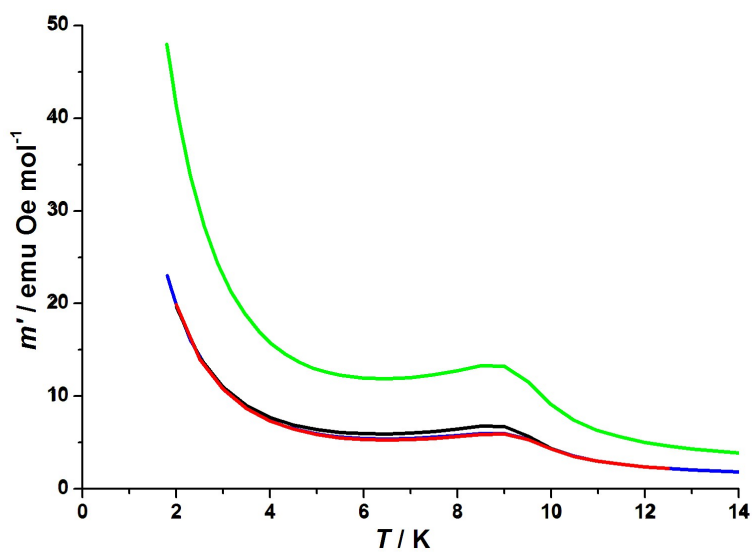

**Fig. S7.** Temperature dependence of the in-phase of **1** measured under various oscillating frequencies with zero field.

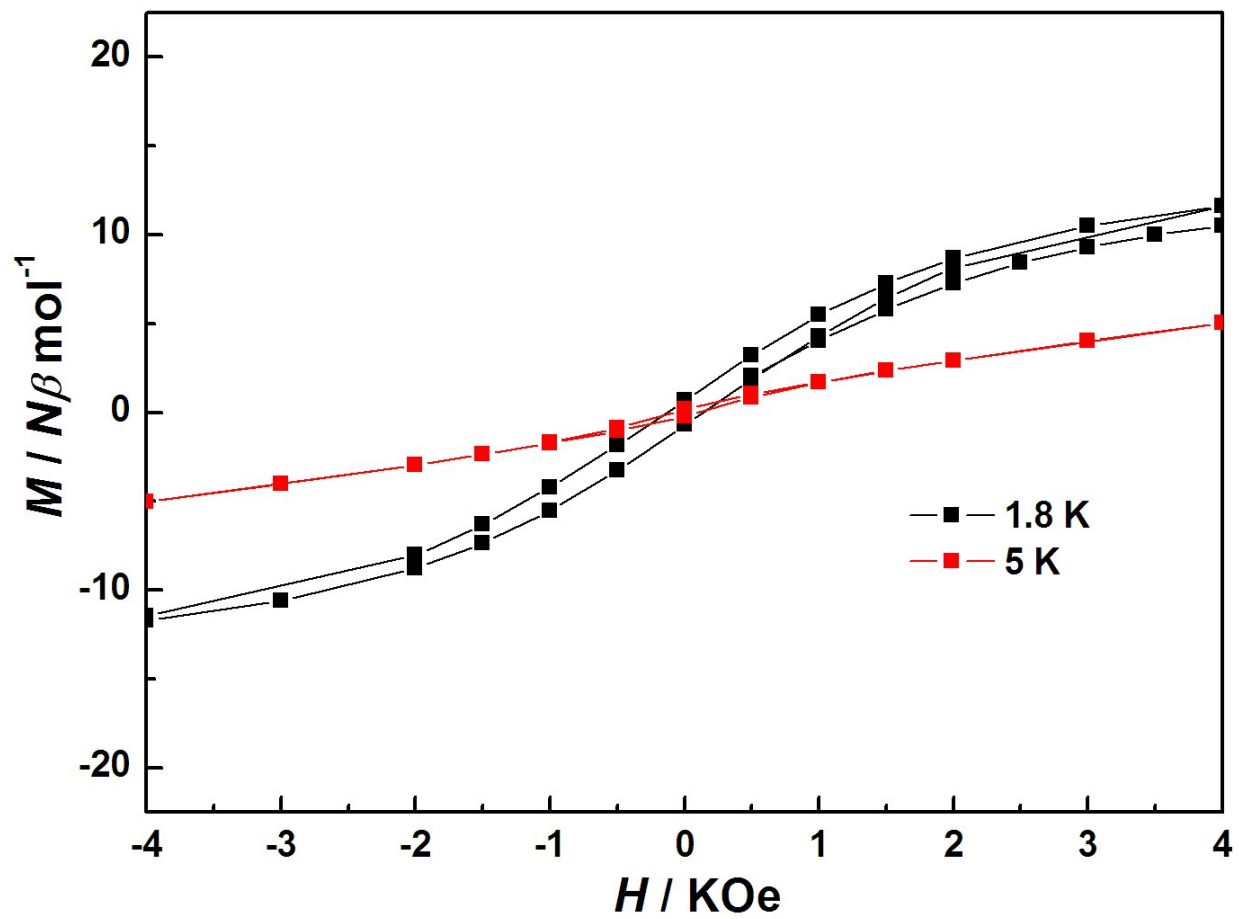

Fig. S8. Hysteresis loop at 1.8 K and 5 K for 1.
